# Supplementary material for: The Clinical Liver Safety Assessment Best Practices Workshop: Rationale, Goals, Accomplishments and the Future
Source: PubMed Central journal article supplement — Drug Saf. 2014 Oct 29;37(Suppl 1):1–7. doi: 10.1007/s40264-014-0181-8 (PMC4212148; doi:10.1007/s40264-014-0181-8), 2014-10-29
Supplement: 40264_2014_181_MOESM1_ESM.pdf [file 40264_2014_181_MOESM1_ESM.pdf]

| <b>Name</b>                     | <b>Affiliation</b>                                       |
|---------------------------------|----------------------------------------------------------|
| <b>Holly Read</b>               | Abbott Laboratories                                      |
| <b>Thierry POYNARD</b>          | Groupe Hospitalier Pitié Salpetriere                     |
| <b>Hugo Perazzo</b>             | Pitié-Salpêtrière Hospital - AP-HP Paris                 |
| <b>Sif Ormarsdottir</b>         | Astra Zeneca                                             |
| <b>Jerry Stern</b>              | Boehringer Ingelheim Pharmaceuticals, Inc                |
| <b>David Hall</b>               | Boehringer Ingelheim Pharmaceuticals, Inc                |
| <b>Herbert L. Bonkovsky</b>     | Carolinas Medical Center and Univ of CT and NC           |
| <b>Arie Regev</b>               | Eli Lilly & Co.                                          |
| <b>Beatriz da Silva Lima</b>    | University of Lisbon                                     |
| <b>Elmer Schabel</b>            | BfArM, Germany                                           |
| <b>John R. Senior</b>           | Office of Pharmacovigilance and Epidemiology/CDER/FDA    |
| <b>Charles Cooper</b>           | FDA                                                      |
| <b>Mark Avigan</b>              | FDA                                                      |
| <b>Leonard B. Seeff</b>         | Hill Group and Food & Drug Administration                |
| <b>Maria Teresa DeMagistris</b> | IMI                                                      |
| <b>James H. Lewis</b>           | Georgetown Univeristy Medical Center                     |
| <b>Ulla Forssen</b>             | GlaxoSmithKline                                          |
| <b>Robert H. Diamond</b>        | GlaxoSmithKline                                          |
| <b>Elliot Norry</b>             | GlaxoSmithKline                                          |
| <b>Paul Watkins</b>             | Hamner/UNC                                               |
| <b>Gordon James Gallivan</b>    | Health Canada                                            |
| <b>Dr. David Wesche</b>         | Lundbeck LLC, Global pharmacovigilance                   |
| <b>Heather Stein</b>            | Millennium Pharmaceuticals                               |
| <b>Yoshiro Saito</b>            | National Institute of Health Sciences, Japan             |
| <b>Keiko Maekawa</b>            | National Institute of Health Sciences, Japan             |
| <b>Lisa Tran</b>                | Novartis Pharmaceuticals Corp                            |
| <b>Michael Merz</b>             | Novartis                                                 |
| <b>Barbara Warner</b>           | Novartis                                                 |
| <b>Patrick Mueller</b>          | Novartis                                                 |
| <b>Johannes Eisinger</b>        | Novartis                                                 |
| <b>Yongyu Wang</b>              | Novartis Pharmaceuticals Corp.<br>Oncology Business Unit |
| <b>Pierre Moulin</b>            | Novartis                                                 |
| <b>Eva Mackerracher</b>         | Novartis Pharma AG                                       |
| <b>Jerry Nedelman</b>           | Novartis                                                 |
| <b>Louis H. Griffel</b>         | Novartis Pharmaceuticals Corporation                     |
| <b>Kimberly Crimin</b>          | Novartis                                                 |
| <b>Eliezer Katz</b>             | Pfizer Specialty Care                                    |
| <b>Dzelal Serdarevic</b>        | Pfizer, Clincial Sciences, Primary Care                  |
| <b>James T. Mayne</b>           | Pfizer Global R & D                                      |
| <b>Cheng-wei Chen</b>           | Shanghai No. 85 Hospital, Shanghai, China                |
| <b>Tim Shi</b>                  | Global MD Organization                                   |

|                                |                                                         |
|--------------------------------|---------------------------------------------------------|
| <b>Yimin Mao</b>               | Shanghai Renji Hospital, Shanghai Jiaotong Univ., China |
| <b>Michele Bortolini</b>       | Hoffmann-La Roche                                       |
| <b>Hajime Takikawa</b>         | Teikyo University School of Medicine                    |
| <b>Sherif George Naguib</b>    | UCB BioSciences, Inc.                                   |
| <b>Raul J. Andrade</b>         | University of Malaga                                    |
| <b>Dominique Larrey</b>        | St Eloi Hospital                                        |
| <b>Guruprasad Padur Aithal</b> | University of Nottingham                                |
| <b>Einar S. Bjornsson</b>      | The National University Hospital of Iceland             |
| <b>Jack Uetrecht</b>           | University of Toronto                                   |
| <b>Neil Kaplowitz</b>          | UCSF                                                    |
| <b>Willis Maddrey</b>          | UT Southwestern Medical Center                          |
